CORRECTION     *The Journal of Experimental Medicine*

---

In the article "Identification of an endogenous membrane anchor-cleaving enzyme for group A streptococcal M protein. Its implication for the attachment of surface proteins in gram-positive bacteria" by Vijaykumar Pancholi and Vincent A. Fischetti (December 1989, 170:2119), the consensus sequence on page 2129, line 16, was typeset incorrectly in proof. The sequence "LP × TG" should read "LPXTG".

---
